# The American Journal of Psychiatry

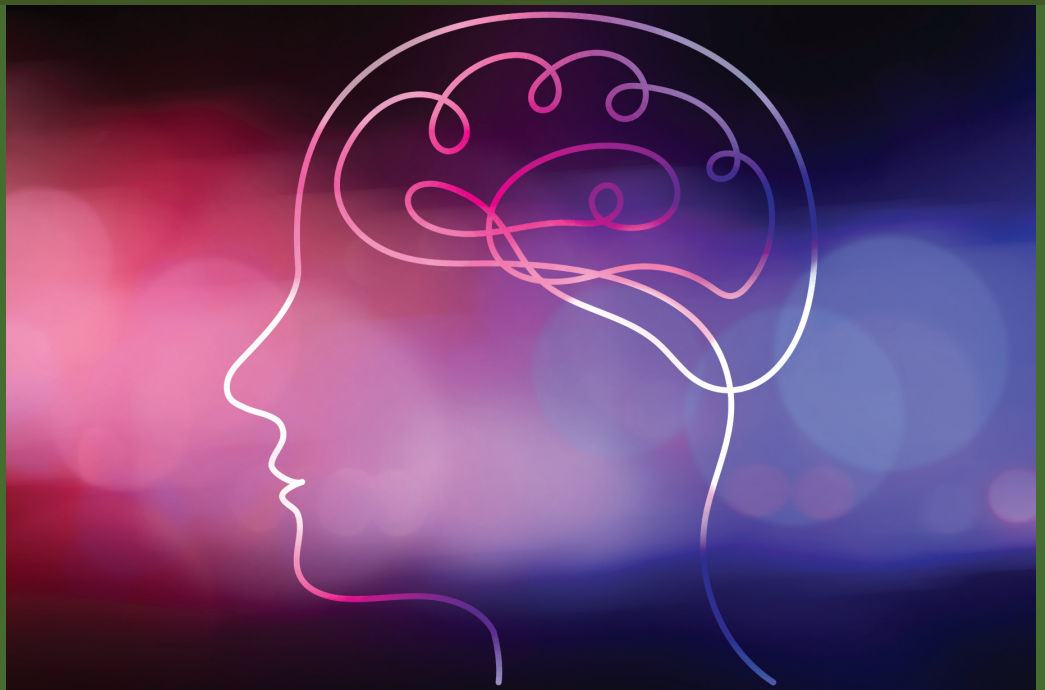

Neurobiology and Treatment of Posttraumatic Stress Disorder

National Trends in Emergency Department Visits for  
Suicide Attempts and Intentional Self-Harm

Sexual Identity Continuity and Change in a U.S. National  
Probability Sample of Sexual Minority Adults

Psychiatric Diagnoses in Parents and Psychiatric, Behavioral,  
and Psychosocial Outcomes in Their Offspring
